# Supplementary material
Source: HighWire-hosted journal article supplement (https://www.cmajopen.ca/highwire/filestream/81053/field_highwire_adjunct_files/0/app1.pdf)
Supplement: app1.pdf [file app1.pdf]

**Appendix 1 (as supplied by the authors): Legal age of driving alone in Canada by province**

| Province                  | Licence Type      | Earliest legal age of driving alone | Government Website                                                                                                                                                                                                                                                                                |
|---------------------------|-------------------|-------------------------------------|---------------------------------------------------------------------------------------------------------------------------------------------------------------------------------------------------------------------------------------------------------------------------------------------------|
| British Columbia          | Class 7           | 17 years                            | <a href="https://www.welcomebc.ca/Start-Your-Life-in-B-C/Daily-Life/Driving-in-B-C#anchor2">https://www.welcomebc.ca/Start-Your-Life-in-B-C/Daily-Life/Driving-in-B-C#anchor2</a>                                                                                                                 |
| Alberta                   | Class 5-GDL       | 16 years                            | <a href="http://www.transportation.alberta.ca/content/doctype47/production/graduateddriverlic.pdf">http://www.transportation.alberta.ca/content/doctype47/production/graduateddriverlic.pdf</a>                                                                                                   |
| Manitoba                  | Class 5I          | 16 years, 3 months                  | <a href="https://www.mpi.mb.ca/en/PDFs/GDLGuide.pdf">https://www.mpi.mb.ca/en/PDFs/GDLGuide.pdf</a>                                                                                                                                                                                               |
| Saskatchewan              | Class 5           | 16 years                            | <a href="https://www.sgi.sk.ca/individuals/licensing/classifications/class7.html">https://www.sgi.sk.ca/individuals/licensing/classifications/class7.html</a>                                                                                                                                     |
| Ontario                   | G2                | 16 years, 8 months                  | <a href="https://www.ontario.ca/page/get-g-drivers-licence-new-drivers">https://www.ontario.ca/page/get-g-drivers-licence-new-drivers</a>                                                                                                                                                         |
| Quebec                    | Class 5           | 17 years                            | <a href="https://saaq.gouv.qc.ca/en/drivers-licences/obtaining-licence/passenger-vehicle-class-5/">https://saaq.gouv.qc.ca/en/drivers-licences/obtaining-licence/passenger-vehicle-class-5/</a>                                                                                                   |
| Nova Scotia               | Class 5N          | 16 years, 9 months                  | <a href="https://novascotia.ca/sns/paal/rmv/paal378.asp">https://novascotia.ca/sns/paal/rmv/paal378.asp</a>                                                                                                                                                                                       |
| New Brunswick             | Class 7 Level 2   | 16 years, 8 months                  | <a href="http://www2.gnb.ca/content/gnb/en/departments/jps/public_safety/content/drivers_vehicles/content/driving_rules/graduated_drivers-faq.html">http://www2.gnb.ca/content/gnb/en/departments/jps/public_safety/content/drivers_vehicles/content/driving_rules/graduated_drivers-faq.html</a> |
| Newfoundland and Labrador | Class 5, Level II | 17 years                            | <a href="http://www.servicenl.gov.nl.ca/drivers/driversandvehicles/driverlicensing/graduateddriver.html">http://www.servicenl.gov.nl.ca/drivers/driversandvehicles/driverlicensing/graduateddriver.html</a>                                                                                       |
| Prince Edward Island      | Class 5           | 16 years, 9 months                  | <a href="https://www.princeedwardisland.ca/en/information/transportation-infrastructure-and-energy/graduated-driver-licensing-program">https://www.princeedwardisland.ca/en/information/transportation-infrastructure-and-energy/graduated-driver-licensing-program</a>                           |
